# Supplementary material for: Differential Sensitivity of the Protein Translation Initiation Machinery and mTOR Signaling to MECP2 Gain- and Loss-of-Function Involves MeCP2 Isoform-Specific Homeostasis in the Brain
Source: MDPI journal article supplement (doi:10.3390/cells11091442), 2022-04-24
Supplement: s1 [file s1]

**Supplementary Table S1.** Two Way ANOVA results applicable to Figure S2 (MTT assay).

| <i>ANOVA table</i> | SS   | DF | MS    | F (DFn, DFd)      | P value  | P value summary |
|--------------------|------|----|-------|-------------------|----------|-----------------|
| Interaction        | 2839 | 8  | 354.9 | F (8, 75) = 3.503 | P=0.0017 | **              |
| Transduction       | 2045 | 4  | 511.3 | F (4, 75) = 5.048 | P=0.0012 | **              |
| Time               | 6005 | 2  | 3003  | F (2, 75) = 29.64 | P<0.0001 | ****            |
| Residual           | 7597 | 75 | 101.3 |                   |          |                 |

**Supplementary Table S2.** Two Way ANOVA results for Nascent RNA (applicable to Figures 4, 6, 7, 8).

| <i>Gene Target</i> | <i>ANOVA table</i> | SS      | DF | MS       | F (DFn, DFd)       | P value  | P value summary |
|--------------------|--------------------|---------|----|----------|--------------------|----------|-----------------|
| <i>MECP2E1</i>     | Interaction        | 1275    | 8  | 159.4    | F (8, 30) = 1.428  | P=0.2255 | ns              |
|                    | Time               | 358.5   | 2  | 179.2    | F (2, 30) = 1.606  | P=0.2175 | ns              |
|                    | Transduction       | 9167    | 4  | 2292     | F (4, 30) = 20.53  | P<0.0001 | ****            |
|                    | Residual           | 3348    | 30 | 111.6    |                    |          |                 |
| <i>MECP2E2</i>     | Interaction        | 879.6   | 8  | 109.9    | F (8, 30) = 10.05  | P<0.0001 | ****            |
|                    | Time               | 543.7   | 2  | 271.9    | F (2, 30) = 24.85  | P<0.0001 | ****            |
|                    | Transduction       | 8727    | 4  | 2182     | F (4, 30) = 199.4  | P<0.0001 | ****            |
|                    | Residual           | 328.2   | 30 |          |                    |          |                 |
| <i>BDNF</i>        | Interaction        | 1.351   | 8  | 0.1689   | F (8, 30) = 1.056  | P=0.4187 | ns              |
|                    | Time               | 1.673   | 2  | 0.8363   | F (2, 30) = 5.228  | P=0.0113 | *               |
|                    | Transduction       | 10.87   | 4  | 2.718    | F (4, 30) = 16.99  | P<0.0001 | ****            |
|                    | Residual           | 4.800   | 30 | 0.1600   |                    |          |                 |
| <i>miR132</i>      | Interaction        | 0.3935  | 8  | 0.04919  | F (8, 30) = 0.3417 | P=0.9423 | ns              |
|                    | Time               | 0.2091  | 2  | 0.1045   | F (2, 30) = 0.7263 | P=0.4920 | ns              |
|                    | Transduction       | 2.525   | 4  | 0.6313   | F (4, 30) = 4.386  | P=0.0065 | **              |
|                    | Residual           | 4.318   | 30 | 0.1439   |                    |          |                 |
| <i>Nucleolin</i>   | Interaction        | 0.04465 | 8  | 0.005581 | F (8, 30) = 0.4468 | P=0.8829 | ns              |
|                    | Time               | 0.04355 | 2  | 0.02178  | F (2, 30) = 1.743  | P=0.1922 | ns              |
|                    | Transduction       | 0.06698 | 4  | 0.01675  | F (4, 30) = 1.340  | P=0.2779 | ns              |
|                    | Residual           | 0.3748  | 30 | 0.01249  |                    |          |                 |
| <i>45S rRNA</i>    | Interaction        | 3.241   | 8  | 0.4052   | F (8, 30) = 0.5608 | P=0.8010 | ns              |
|                    | Time               | 2.321   | 2  | 1.161    | F (2, 30) = 1.606  | P=0.2174 | ns              |
|                    | Transduction       | 1.308   | 4  | 0.3269   | F (4, 30) = 0.4525 | P=0.7697 | ns              |
|                    | Residual           | 21.67   | 30 | 0.7225   |                    |          |                 |
| <i>28S</i>         | Interaction        | 0.4836  | 8  | 0.06046  | F (8, 30) = 0.6086 | P=0.7633 | ns              |
|                    | Time               | 0.1530  | 2  | 0.07648  | F (2, 30) = 0.7699 | P=0.4720 | ns              |
|                    | Transduction       | 0.5779  | 4  | 0.1445   | F (4, 30) = 1.454  | P=0.2407 | ns              |

|     |              |         |    |         |                   |          |      |
|-----|--------------|---------|----|---------|-------------------|----------|------|
|     | Residual     | 2.980   | 30 | 0.09934 |                   |          |      |
|     |              |         |    |         |                   |          |      |
| 18S | Interaction  | 0.1329  | 8  | 0.01661 | F (8, 30) = 1.274 | P=0.2935 | ns   |
|     | Time         | 0.02695 | 2  | 0.01347 | F (2, 30) = 1.034 | P=0.3680 | ns   |
|     | Transduction | 0.4643  | 4  | 0.1161  | F (4, 30) = 8.905 | P<0.0001 | **** |
|     | Residual     | 0.3910  | 30 | 0.01303 |                   |          |      |

**Supplementary Table S3.** Two Way ANOVA results for Total RNA (applicable to Figures 4, 6, 7, 8).

| <i>Gene Target</i> | <i>ANOVA table</i> | <b>SS</b> | <b>DF</b> | <b>MS</b> | <b>F (DFn, DFd)</b> | <b>P value</b> | <b>P value summary</b> |
|--------------------|--------------------|-----------|-----------|-----------|---------------------|----------------|------------------------|
| <i>MECP2E1</i>     | Interaction        | 39.05     | 8         | 4.882     | F (8, 30) = 0.3648  | P=0.9309       | ns                     |
|                    | Time               | 17.08     | 2         | 8.538     | F (2, 30) = 0.6380  | P=0.5354       | ns                     |
|                    | Transduction       | 5497      | 4         | 1374      | F (4, 30) = 102.7   | P<0.0001       | ****                   |
|                    | Residual           | 401.5     | 30        | 13.38     |                     |                |                        |
| <i>MECP2E2</i>     | Interaction        | 24.13     | 8         | 3.016     | F (8, 30) = 0.2649  | P=0.9725       | ns                     |
|                    | Time               | 8.667     | 2         | 4.333     | F (2, 30) = 0.3807  | P=0.6867       | ns                     |
|                    | Transduction       | 8869      | 4         | 2217      | F (4, 30) = 194.8   | P<0.0001       | ****                   |
|                    | Residual           | 341.5     | 30        | 11.38     |                     |                |                        |
| <i>BDNF</i>        | Interaction        | 2.298     | 8         | 0.2872    | F (8, 30) = 6.178   | P=0.0001       | ***                    |
|                    | Time               | 3.304     | 2         | 1.652     | F (2, 30) = 35.53   | P<0.0001       | ****                   |
|                    | Transduction       | 19.86     | 4         | 4.965     | F (4, 30) = 106.8   | P<0.0001       | ****                   |
|                    | Residual           | 1.395     | 30        | 0.04649   |                     |                |                        |
| <i>miR132</i>      | Interaction        | 1.175     | 8         | 0.1469    | F (8, 30) = 0.4395  | P=0.8876       | ns                     |
|                    | Time               | 1.700     | 2         | 0.8498    | F (2, 30) = 2.543   | P=0.0955       | ns                     |
|                    | Transduction       | 1.356     | 4         | 0.3390    | F (4, 30) = 1.014   | P=0.4157       | ns                     |
|                    | Residual           | 10.03     | 30        | 0.3342    |                     |                |                        |
| <i>Nucleolin</i>   | Interaction        | 0.05647   | 8         | 0.007058  | F (8, 30) = 0.7062  | P=0.6838       | ns                     |
|                    | Time               | 0.004821  | 2         | 0.002411  | F (2, 30) = 0.2412  | P=0.7872       | ns                     |
|                    | Transduction       | 0.2394    | 4         | 0.05986   | F (4, 30) = 5.988   | P=0.0012       | **                     |
|                    | Residual           | 0.2999    | 30        | 0.009995  |                     |                |                        |
| <i>45S rRNA</i>    | Interaction        | 3.231     | 8         | 0.4039    | F (8, 30) = 0.6056  | P=0.7657       | ns                     |
|                    | Time               | 9.146     | 2         | 4.573     | F (2, 30) = 6.858   | P=0.0035       | **                     |
|                    | Transduction       | 2.860     | 4         | 0.7150    | F (4, 30) = 1.072   | P=0.3876       | ns                     |
|                    | Residual           | 20.00     | 30        | 0.6668    |                     |                |                        |
| <i>28S rRNA</i>    | Interaction        | 2.089     | 8         | 0.2611    | F (8, 30) = 0.6435  | P=0.7352       | ns                     |
|                    | Time               | 5.574     | 2         | 2.787     | F (2, 30) = 6.868   | P=0.0035       | **                     |
|                    | Transduction       | 2.012     | 4         | 0.5031    | F (4, 30) = 1.240   | P=0.3152       | ns                     |
|                    | Residual           | 12.17     | 30        | 0.4058    |                     |                |                        |

|          |              |        |    |         |                    |          |    |
|----------|--------------|--------|----|---------|--------------------|----------|----|
| 18S rRNA | Interaction  | 0.3190 | 8  | 0.03988 | F (8, 30) = 0.6168 | P=0.7568 | ns |
|          | Time         | 0.1949 | 2  | 0.09746 | F (2, 30) = 1.507  | P=0.2378 | ns |
|          | Transduction | 1.032  | 4  | 0.2581  | F (4, 30) = 3.992  | P=0.0103 | *  |
|          | Residual     | 1.940  | 30 | 0.06465 |                    |          |    |

**Supplementary Table S4.** Two Way ANOVA results applicable to Figure 5 (MTT assay for MG132).

| <i>ANOVA table</i>  | SS    | DF | MS    | F (DFn, DFd)      | P value  | P value summary |
|---------------------|-------|----|-------|-------------------|----------|-----------------|
| Interaction         | 6889  | 8  | 861.1 | F (8, 60) = 33.03 | P<0.0001 | ****            |
| Time                | 23914 | 2  | 11957 | F (2, 60) = 458.7 | P<0.0001 | ****            |
| MG132 Concentration | 12605 | 4  | 3151  | F (4, 60) = 120.9 | P<0.0001 | ****            |
| Residual            | 1564  | 60 | 26.07 |                   |          |                 |

**Supplementary Table S5.** One Way ANOVA results applicable to protein levels in Figures 6, 7, 9, and 10.

| <i>Protein</i>     | <i>ANOVA table</i> | SS     | DF | MS      | F (DFn, DFd)       | P value  | P value summary |
|--------------------|--------------------|--------|----|---------|--------------------|----------|-----------------|
| <i>Figure 6C</i>   |                    |        |    |         |                    |          |                 |
| BDNF (25 kDa)      | Transduction       | 0.5978 | 4  | 0.1495  | F (4, 15) = 1.480  | P=0.2575 | ns              |
|                    | Residual           | 1.514  | 15 | 0.1010  |                    |          |                 |
|                    | Total              | 2.112  | 19 |         |                    |          |                 |
| BDNF (25 & 30 kDa) | Transduction       | 0.5048 | 4  | 0.1262  | F (4, 15) = 3.881  | P=0.0234 | *               |
|                    | Residual           | 0.4878 | 15 | 0.03252 |                    |          |                 |
|                    | Total              | 0.9926 | 19 |         |                    |          |                 |
| BDNF (30 kDa)      | Transduction       | 25.78  | 4  | 6.446   | F (4, 15) = 1.060  | P=0.4099 | ns              |
|                    | Residual           | 91.18  | 15 | 6.078   |                    |          |                 |
|                    | Total              | 117.0  | 19 |         |                    |          |                 |
| <i>Figure 7B</i>   |                    |        |    |         |                    |          |                 |
| Nucleolin          | Transduction       | 0.3613 | 4  | 0.09032 | F (4, 25) = 0.2905 | P=0.8813 | ns              |
|                    | Residual           | 7.771  | 25 | 0.3109  |                    |          |                 |
|                    | Total              | 8.133  | 29 |         |                    |          |                 |
| <i>Figure 9</i>    |                    |        |    |         |                    |          |                 |
| mTOR               | Transduction       | 0.4365 | 4  | 0.1091  | F (4, 15) = 0.3962 | P=0.8082 | ns              |
|                    | Residual           | 4.131  | 15 | 0.2754  |                    |          |                 |
|                    | Total              | 4.568  | 19 |         |                    |          |                 |
| Raptor             | Transduction       | 0.7777 | 4  | 0.1944  | F (4, 25) = 0.5746 | P=0.6836 | ns              |
|                    | Residual           | 8.459  | 25 | 0.3384  |                    |          |                 |
|                    | Total              | 9.237  | 29 |         |                    |          |                 |
| Rictor             | Transduction       | 0.2412 | 4  | 0.06030 | F (4, 15) = 0.6584 | P=0.6302 | ns              |
|                    | Residual           | 1.374  | 15 | 0.09158 |                    |          |                 |
|                    | Total              | 1.615  | 19 |         |                    |          |                 |
| AKT                | Transduction       | 0.3178 | 4  | 0.07944 | F (4, 25) = 0.4893 | P=0.7435 | ns              |
|                    | Residual           | 4.059  | 25 | 0.1623  |                    |          |                 |

|                            |              |         |    |          |                      |          |    |
|----------------------------|--------------|---------|----|----------|----------------------|----------|----|
|                            | Total        | 4.376   | 29 |          |                      |          |    |
| p-mTOR<br>(S2481)          | Transduction | 1.871   | 4  | 0.4678   | F (4, 15) = 0.4481   | P=0.7722 | ns |
|                            | Residual     | 15.66   | 15 | 1.044    |                      |          |    |
|                            | Total        | 17.53   | 19 |          |                      |          |    |
| p-mTOR<br>(S2448)          | Transduction | 5.378   | 4  | 1.345    | F (4, 15) = 0.4771   | P=0.7521 | ns |
|                            | Residual     | 42.27   | 15 | 2.818    |                      |          |    |
|                            | Total        | 47.65   | 19 |          |                      |          |    |
| p-AKT                      | Transduction | 5.425   | 4  | 1.356    | F (4, 20) = 0.8439   | P=0.5138 | ns |
|                            | Residual     | 32.14   | 20 | 1.607    |                      |          |    |
|                            | Total        | 37.57   | 24 |          |                      |          |    |
| p-mTOR<br>(S2481):<br>mTOR | Transduction | 2.803   | 4  | 0.7009   | F (4, 15) = 0.8255   | P=0.5291 | ns |
|                            | Residual     | 12.73   | 15 | 0.8490   |                      |          |    |
|                            | Total        | 15.54   | 19 |          |                      |          |    |
| p-mTOR<br>(S2448):<br>mTOR | Transduction | 9.871   | 4  | 2.468    | F (4, 15) = 0.6227   | P=0.6534 | ns |
|                            | Residual     | 59.44   | 15 | 3.963    |                      |          |    |
|                            | Total        | 69.31   | 19 |          |                      |          |    |
| p-AKT: AKT                 | Transduction | 19.66   | 4  | 4.914    | F (4, 20) = 0.8077   | P=0.5348 | ns |
|                            | Residual     | 121.7   | 20 | 6.084    |                      |          |    |
|                            | Total        | 141.3   | 24 |          |                      |          |    |
| <i>Figure 10</i>           |              |         |    |          |                      |          |    |
| S6                         | Transduction | 0.01487 | 4  | 0.003717 | F (4, 25) = 0.1718   | P=0.9508 | ns |
|                            | Residual     | 0.5408  | 25 | 0.02163  |                      |          |    |
|                            | Total        | 0.5557  | 29 |          |                      |          |    |
| 4-EBP1                     | Transduction | 0.1306  | 4  | 0.03264  | F (4, 25) = 0.1917   | P=0.9404 | ns |
|                            | Residual     | 4.256   | 25 | 0.1702   |                      |          |    |
|                            | Total        | 4.386   | 29 |          |                      |          |    |
| p-S6<br>(S235/236)         | Transduction | 0.1646  | 4  | 0.04115  | F (4, 15) = 0.2303   | P=0.9171 | ns |
|                            | Residual     | 2.681   | 15 | 0.1787   |                      |          |    |
|                            | Total        | 2.845   | 19 |          |                      |          |    |
| p-S6<br>(S240/244)         | Transduction | 75.45   | 4  | 18.86    | F (4, 25) = 0.7002   | P=0.5991 | ns |
|                            | Residual     | 673.4   | 25 | 26.94    |                      |          |    |
|                            | Total        | 748.9   | 29 |          |                      |          |    |
| p-4EBP1<br>(S65)           | Transduction | 0.4247  | 4  | 0.1062   | F (4, 15) = 0.1285   | P=0.9697 | ns |
|                            | Residual     | 12.39   | 15 | 0.8263   |                      |          |    |
|                            | Total        | 12.82   | 19 |          |                      |          |    |
| p-S6<br>(S235/236):<br>S6  | Transduction | 0.09786 | 4  | 0.02446  | "F (4, 15) = 0.1849" | P=0.9426 | ns |
|                            | Residual     | 1.984   | 15 | 0.1323   |                      |          |    |
|                            | Total        | 2.082   | 1  |          |                      |          |    |
| p-S6<br>(S240/244):<br>S6  | Transduction | 58.37   | 4  | 14.59    | F (4, 25) = 0.7172   | P=0.5881 | ns |
|                            | Residual     | 508.6   | 25 | 20.34    |                      |          |    |
|                            | Total        | 567.0   | 29 |          |                      |          |    |
| p-4EBP1<br>(T37/46)        | Transduction | 0.6387  | 4  | 0.1597   | F (4, 20) = 0.6610   | P=0.6263 | ns |
|                            | Residual     | 4.831   | 20 | 0.2416   |                      |          |    |
|                            | Total        | 5.470   | 24 |          |                      |          |    |
|                            | Transduction | 1.417   | 4  | 0.3542   | F (4, 15) = 0.3058   | P=0.8696 | ns |



|                               |              |        |    |         |                    |          |    |
|-------------------------------|--------------|--------|----|---------|--------------------|----------|----|
| p-4EBP1<br>(S65): 4EBP1       | Residual     | 17.37  | 15 | 1.158   |                    |          |    |
|                               | Total        | 18.79  | 19 |         |                    |          |    |
| p-4EBP1<br>(T37/46):<br>4EBP1 | Transduction | 0.2865 | 4  | 0.07162 | F (4, 20) = 0.1917 | P=0.9399 | ns |
|                               | Residual     | 7.471  | 20 | 0.3736  |                    |          |    |
|                               | Total        | 7.758  | 24 |         |                    |          |    |
| <i>Figure S3</i>              |              |        |    |         |                    |          |    |
| H3K4Me3                       | Transduction | 0.3499 | 4  | 0.08747 | F (4, 15) = 2.340  | P=0.1022 | ns |
|                               | Residual     | 0.5606 | 15 | 0.03737 |                    |          |    |
|                               | Total        | 0.9105 | 19 |         |                    |          |    |
| H3K9Me3                       | Transduction | 1.919  | 4  | 0.4796  | F (4, 15) = 0.7669 | P=0.5631 | ns |
|                               | Residual     | 9.382  | 15 | 0.6255  |                    |          |    |
|                               | Total        | 11.30  | 19 |         |                    |          |    |
| H3K27Me3                      | Transduction | 0.3115 | 4  | 0.07788 | F (4, 15) = 0.4731 | P=0.7548 | ns |
|                               | Residual     | 2.469  | 15 | 0.1646  |                    |          |    |
|                               | Total        | 2.781  | 19 |         |                    |          |    |

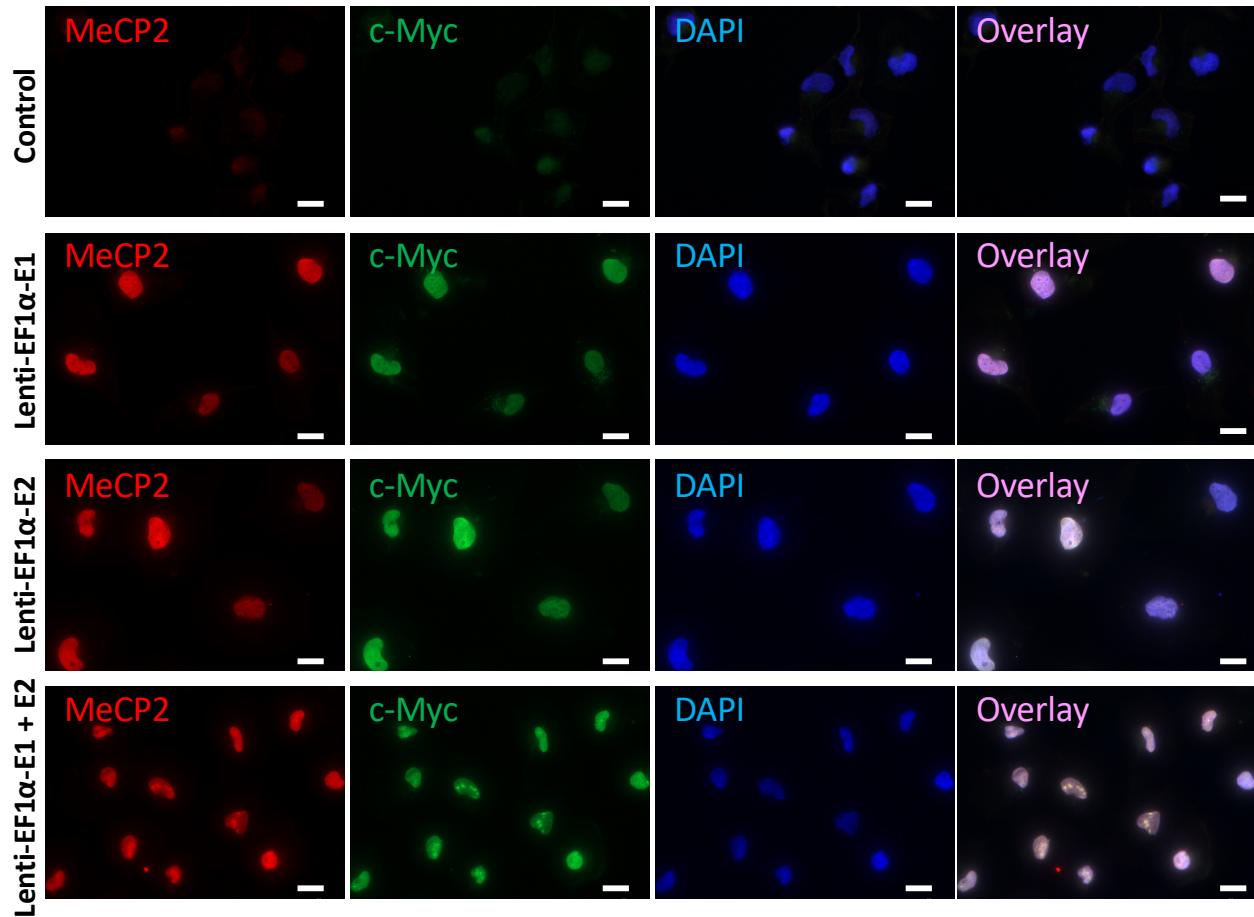

**Supplementary Figure S1.** Immunofluorescence imaging of MeCP2 and c-Myc in transduced Daoy cells. Images show MeCP2 (red) and c-Myc tag (green) in the nuclei of non-transduced control Daoy cells, and cells transduced with Lenti-EF1 $\alpha$ -E1, Lenti-EF1 $\alpha$ -E2, and Lenti-EF1 $\alpha$ -E1+Lenti-EF1 $\alpha$ -E2 vectors. Scale bars represents 20  $\mu$ m.

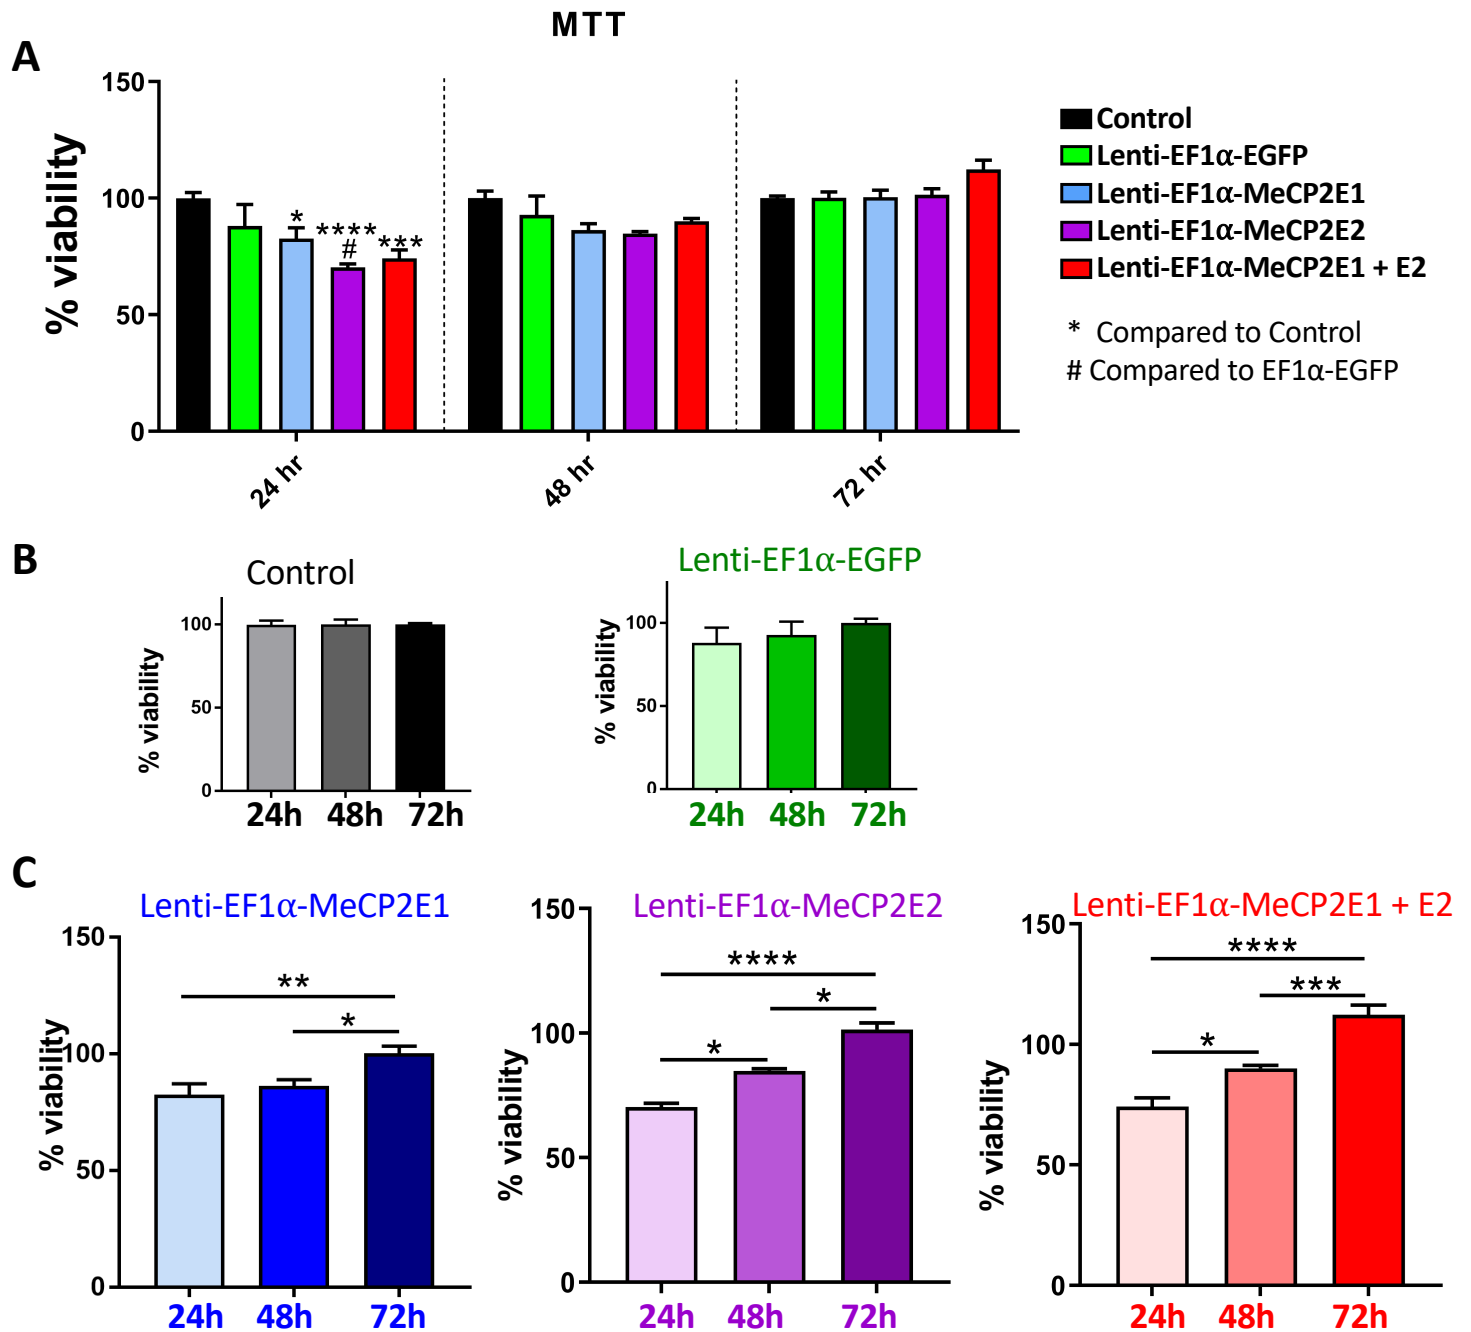

**Supplementary Figure S2.** MTT cell viability assay of Daoy cells transduced with lentiviral vectors expressing EGFP or overexpressing *MECP2E1* and *MECP2E2* isoforms. MTT assay was performed at 24h, 48h, and 72h following seeding and percent viability determined relative to non-transduced control Daoy cells. A) Differences in percent viability between the transduced cell types at each time point. B-C) Differences in percent viability between time points for each cell type. Experiments are done twice independently, each time in triplicates: N=2, n=6, and data are reported as mean  $\pm$  SEM. Results are analyzed by two-way ANOVA followed by Tukey's multiple comparisons test. Significances from Tukey's multiple comparisons test are presented as \* $p < 0.05$ , \*\* $p < 0.01$ , \*\*\* $p < 0.001$ , and \*\*\*\* $p < 0.0001$ .

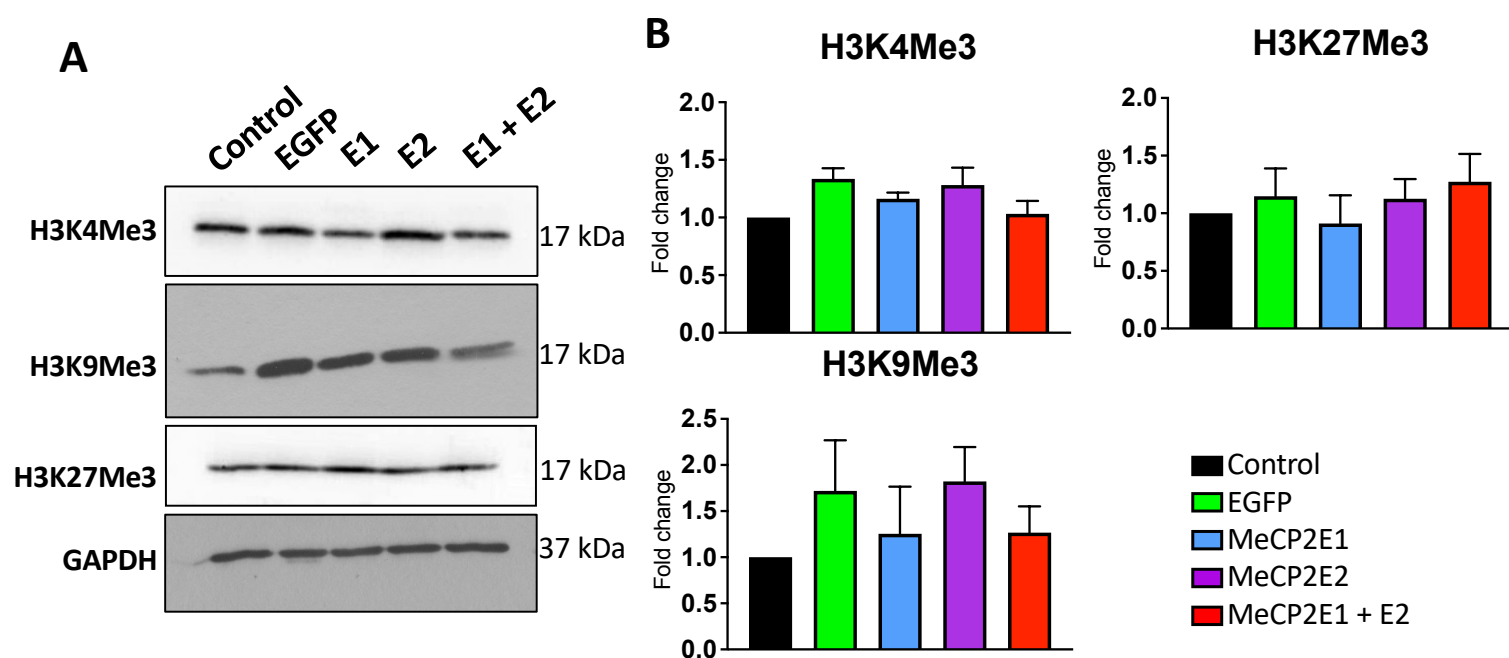

**Supplementary Figure S3.** Protein analysis of indicated histone modifications in Daoy cells transduced with lentiviral vectors expressing MeCP2 isoforms. A) Western blot analysis of the indicated proteins in non-transduced control Daoy cells, EGFP-transduced (EGFP), E1-transduced (E1), E2-transduced (E2) and E1+E2-transduced (E1+E2) cells. B) Quantification of the indicated total proteins from A. N=4, and data are reported as mean  $\pm$  SEM.
